# Supplementary material for: Digital Solutions Available to Be Used by Informal Caregivers, Contributing to Medication Adherence: A Scoping Review
Source: MDPI journal article supplement (doi:10.3390/pharmacy12010020), 2024-01-23
Supplement: s1 [file s1]

# Digital Solutions Available to Be Used by Informal Caregivers, Contributing to Medication Adherence: A Scoping Review

Margarida Espírito-Santo, Sancha Santos and Maria Dulce Estêvão

Table S1. Search strategy – PubMed e Web of Science.

|    | Keyword combination                                                                                                                                                                                                                                                                                                                                                                               |
|----|---------------------------------------------------------------------------------------------------------------------------------------------------------------------------------------------------------------------------------------------------------------------------------------------------------------------------------------------------------------------------------------------------|
| 1. | ("medication adherence"[Title/Abstract]) OR ("medication compliance"[Title/Abstract])) OR ("drug adherence"[Title/Abstract])                                                                                                                                                                                                                                                                      |
| 2. | ((((("application"[Title/Abstract]) OR ("software application" MeSH[Title/Abstract])) OR ("mobile applications" MeSH[Title/Abstract])) OR ("mobile health"[Title/Abstract])) OR ("mobile health care applications"[Title/Abstract])) OR ("telehealth"[Title/Abstract])) OR ("smartphone apps" MeSH[Title/Abstract])) OR ("technology"[Title/Abstract])) OR ("health information"[Title/Abstract]) |
| 3. | ((((("caregiver"[Title/Abstract]) OR ("informal caregivers"[Title/Abstract])) OR ("spouse caregivers"[Title/Abstract])) OR ("family caregiver"[Title/Abstract])) OR ("caretaker"[Title/Abstract])) OR ("informal caretaker"[Title/Abstract])) OR ("patient sitter"[Title/Abstract])                                                                                                               |
| 4. | (1) AND (2) AND (3)                                                                                                                                                                                                                                                                                                                                                                               |
